# Supplementary material for: Exposure of Keratinocytes to Candida Albicans in the Context of Atopic Milieu Induces Changes in the Surface Glycosylation Pattern of Small Extracellular Vesicles to Enhance Their Propensity to Interact With Inhibitory Siglec Receptors
Source: Front Immunol. 2022 Jun 9;13:884530. doi: 10.3389/fimmu.2022.884530 (PMC9248261; doi:10.3389/fimmu.2022.884530)
Supplement: Supplementary file 7 [file Table_1.xlsx]

## Sheet: Protein list
Table S1. Mass spectrometry analysis of proteins in sEVNHEK secreted by AD cytokine-exposed NHEKs.
sEV0.06NHEK		sEV1.5NHEK
UniProt accession no.	UniProt protein name	UniProt accession no.	UniProt protein name
Q13905	Rap guanine nucleotide exchange factor 1	Q13905	Rap guanine nucleotide exchange factor 1
P00966	Argininosuccinate synthase	P12830	Cadherin-1
Q03001	Dystonin	P48637	Glutathione synthetase
Q96T23	Remodeling and spacing factor 1	Q9H1P3	Oxysterol-binding protein-related protein 2
Q13561	Dynactin subunit 2	P51148	Ras-related protein Rab-5C
P12830	Cadherin-1	P21926	CD9 antigen
P48637	Glutathione synthetase	Q07021	Complement component 1 Q subcomponent-binding protein, mitochondrial
Q07866	Kinesin light chain 1	Q9NZN4	EH domain-containing protein 2
Q9H1P3	Oxysterol-binding protein-related protein 2	P62873	Guanine nucleotide-binding protein G(I)/G(S)/G(T) subunit beta-1
P51148	Ras-related protein Rab-5C	P68133	Actin, alpha skeletal muscle
O75390	Citrate synthase, mitochondrial	Q99878	Histone H2A type 1-J
P21926	CD9 antigen	P63261	Actin, cytoplasmic 2
P26368	Splicing factor U2AF 65 kDa subunit	P68371	Tubulin beta-4B chain
P30825	High affinity cationic amino acid transporter 1	Q86X29	Lipolysis-stimulated lipoprotein receptor
Q9BY76	Angiopoietin-related protein 4	P18621	60S ribosomal protein L17
P53999	Activated RNA polymerase II transcriptional coactivator p15	P62258	14-3-3 protein epsilon
P53985	Monocarboxylate transporter 1	O15143	Actin-related protein 2/3 complex subunit 1B
P30419	Glycylpeptide N-tetradecanoyltransferase 1	P0DJI8	Serum amyloid A-1 protein
P35225	Interleukin-13	Q04695	Keratin, type I cytoskeletal 17
P61978	Heterogeneous nuclear ribonucleoprotein K	P02538	Keratin, type II cytoskeletal 6A
P15531	Nucleoside diphosphate kinase A	Q96TA1	Protein Niban 2
P61026	Ras-related protein Rab-10	Q8WUA8	Tsukushi
Q71UI9	Histone H2A.V	Q06830	Peroxiredoxin-1
Q07021	Complement component 1 Q subcomponent-binding protein, mitochondrial	P62937	Peptidyl-prolyl cis-trans isomerase A
P31151	Protein S100-A7	P29034	Protein S100-A2
P08962	CD63 antigen	P62140	Serine/threonine-protein phosphatase PP1-beta catalytic subunit
P62280	40S ribosomal protein S11	P27701	CD82 antigen
Q8NFJ5	Retinoic acid-induced protein 3	P00749	Urokinase-type plasminogen activator
Q12906	Interleukin enhancer-binding factor 3	P12109	Collagen alpha-1(VI) chain
P46976	Glycogenin-1	P61981	14-3-3 protein gamma
Q12805	EGF-containing fibulin-like extracellular matrix protein 1	P18827	Syndecan-1
P13726	Tissue factor	Q96QD8	Sodium-coupled neutral amino acid transporter 2
Q9NZN4	EH domain-containing protein 2	P02792	Ferritin light chain
Q8NDH3	Probable aminopeptidase NPEPL1	P11166	Solute carrier family 2, facilitated glucose transporter member 1
Q8WUX1	Sodium-coupled neutral amino acid transporter 5	P13647	Keratin, type II cytoskeletal 5
P52272	Heterogeneous nuclear ribonucleoprotein M	P31431	Syndecan-4
P62873	Guanine nucleotide-binding protein G(I)/G(S)/G(T) subunit beta-1	P60033	CD81 antigen
P68133	Actin, alpha skeletal muscle	P02533	Keratin, type I cytoskeletal 14
Q99878	Histone H2A type 1-J	Q8WZ42	Titin
P63261	Actin, cytoplasmic 2	P28838	Cytosol aminopeptidase
P68371	Tubulin beta-4B chain	Q15758	Neutral amino acid transporter B(0)
Q86XX4	Extracellular matrix organizing protein FRAS1	P11940	Polyadenylate-binding protein 1
O75882	Attractin	Q15631	Translin
O95450	A disintegrin and metalloproteinase with thrombospondin motifs 2	O00622	CCN family member 1
O00148	ATP-dependent RNA helicase DDX39A	P22392	Nucleoside diphosphate kinase B
P46779	60S ribosomal protein L28	Q07020	60S ribosomal protein L18
Q01813	ATP-dependent 6-phosphofructokinase, platelet type	Q03135	Caveolin-1
P00533	Epidermal growth factor receptor	P06703	Protein S100-A6
P62829	60S ribosomal protein L23	O00487	26S proteasome non-ATPase regulatory subunit 14
P13987	CD59 glycoprotein	P31947	14-3-3 protein sigma
P12268	Inosine-5'-monophosphate dehydrogenase 2	P37837	Transaldolase
P34931	Heat shock 70 kDa protein 1-like	O15145	Actin-related protein 2/3 complex subunit 3
Q13347	Eukaryotic translation initiation factor 3 subunit I	Q96FQ6	Protein S100-A16
Q7Z406	Myosin-14	P29692	Elongation factor 1-delta
Q16222	UDP-N-acetylhexosamine pyrophosphorylase	P59998	Actin-related protein 2/3 complex subunit 4
P11233	Ras-related protein Ral-A	O00469	Procollagen-lysine,2-oxoglutarate 5-dioxygenase 2
P62277	40S ribosomal protein S13	P68366	Tubulin alpha-4A chain
Q86X29	Lipolysis-stimulated lipoprotein receptor	P51665	26S proteasome non-ATPase regulatory subunit 7
P18621	60S ribosomal protein L17	P31949	Protein S100-A11
Q2M2H8	Probable maltase-glucoamylase 2	P04083	Annexin A1
P13667	Protein disulfide-isomerase A4	P47929	Galectin-7
P63010	AP-2 complex subunit beta	P19105	Myosin regulatory light chain 12A
P48509	CD151 antigen	P43686	26S proteasome regulatory subunit 6B
Q9NRY6	Phospholipid scramblase 3	P0DP25	Calmodulin-3
P07741	Adenine phosphoribosyltransferase	Q9BUF5	Tubulin beta-6 chain
P62081	40S ribosomal protein S7	P12532	Creatine kinase U-type, mitochondrial
Q32P51	Heterogeneous nuclear ribonucleoprotein A1-like 2	P07437	Tubulin beta chain
P62258	14-3-3 protein epsilon	P15880	40S ribosomal protein S2
P16152	Carbonyl reductase [NADPH] 1	P01130	Low-density lipoprotein receptor
O15143	Actin-related protein 2/3 complex subunit 1B	P62987	Ubiquitin-60S ribosomal protein L40
P62913	60S ribosomal protein L11	Q7L576	Cytoplasmic FMR1-interacting protein 1
P24534	Elongation factor 1-beta	Q99873	Protein arginine N-methyltransferase 1
P0DJI8	Serum amyloid A-1 protein	P23528	Cofilin-1
Q04695	Keratin, type I cytoskeletal 17	P52209	6-phosphogluconate dehydrogenase, decarboxylating
P02538	Keratin, type II cytoskeletal 6A	P30153	Serine/threonine-protein phosphatase 2A 65 kDa regulatory subunit A alpha isoform
Q9UI42	Carboxypeptidase A4	P62333	26S proteasome regulatory subunit 10B
Q9Y490	Talin-1	P28072	Proteasome subunit beta type-6
P62269	40S ribosomal protein S18	O00754	Lysosomal alpha-mannosidase
P62906	60S ribosomal protein L10a	Q13162	Peroxiredoxin-4
P38571	Lysosomal acid lipase/cholesteryl ester hydrolase	P18206	Vinculin
P61970	Nuclear transport factor 2	Q96QK1	Vacuolar protein sorting-associated protein 35
P62424	60S ribosomal protein L7a	P10909	Clusterin
Q96TA1	Protein Niban 2	P07686	Beta-hexosaminidase subunit beta
Q8WUA8	Tsukushi	P02786	Transferrin receptor protein 1
Q06830	Peroxiredoxin-1	P33176	Kinesin-1 heavy chain
O95832	Claudin-1	P14324	Farnesyl pyrophosphate synthase
P07954	Fumarate hydratase, mitochondrial	Q16394	Exostosin-1
Q92820	Gamma-glutamyl hydrolase	P61163	Alpha-centractin
O14744	Protein arginine N-methyltransferase 5	P01024	Complement C3
P39060	Collagen alpha-1(XVIII) chain	P15311	Ezrin
P62937	Peptidyl-prolyl cis-trans isomerase A	Q9NQC3	Reticulon-4
P55209	Nucleosome assembly protein 1-like 1	P28070	Proteasome subunit beta type-4
Q01628	Interferon-induced transmembrane protein 3	Q99436	Proteasome subunit beta type-7
Q01650	Large neutral amino acids transporter small subunit 1	P27708	CAD protein
P61247	40S ribosomal protein S3a	P49720	Proteasome subunit beta type-3
P07384	Calpain-1 catalytic subunit	Q9Y265	RuvB-like 1
Q14103	Heterogeneous nuclear ribonucleoprotein D0	Q99460	26S proteasome non-ATPase regulatory subunit 1
P84077	ADP-ribosylation factor 1	Q9BXJ1	Complement C1q tumor necrosis factor-related protein 1
P19883	Follistatin	Q16555	Dihydropyrimidinase-related protein 2
O14579	Coatomer subunit epsilon	P60660	Myosin light polypeptide 6
P29034	Protein S100-A2	P28074	Proteasome subunit beta type-5
P62140	Serine/threonine-protein phosphatase PP1-beta catalytic subunit	P25789	Proteasome subunit alpha type-4
P27701	CD82 antigen	P62241	40S ribosomal protein S8
P52907	F-actin-capping protein subunit alpha-1	O15144	Actin-related protein 2/3 complex subunit 2
P27348	14-3-3 protein theta	P63104	14-3-3 protein zeta/delta
P00749	Urokinase-type plasminogen activator	P13497	Bone morphogenetic protein 1
P12109	Collagen alpha-1(VI) chain	Q15008	26S proteasome non-ATPase regulatory subunit 6
P61981	14-3-3 protein gamma	O00232	26S proteasome non-ATPase regulatory subunit 12
P18827	Syndecan-1	Q14697	Neutral alpha-glucosidase AB
Q96QD8	Sodium-coupled neutral amino acid transporter 2	Q9UNM6	26S proteasome non-ATPase regulatory subunit 13
P02792	Ferritin light chain	P26038	Moesin
P11166	Solute carrier family 2, facilitated glucose transporter member 1	Q15063	Periostin
P48163	NADP-dependent malic enzyme	P60228	Eukaryotic translation initiation factor 3 subunit E
P84243	Histone H3.3	P02794	Ferritin heavy chain
P13647	Keratin, type II cytoskeletal 5	P49721	Proteasome subunit beta type-2
P31431	Syndecan-4	Q92598	Heat shock protein 105 kDa
P60033	CD81 antigen	P28799	Progranulin
P02533	Keratin, type I cytoskeletal 14	P00558	Phosphoglycerate kinase 1
Q8WZ42	Titin	P61160	Actin-related protein 2
Q9UHD8	Septin-9	P05067	Amyloid-beta precursor protein
Q9UPN3	Microtubule-actin cross-linking factor 1, isoforms 1/2/3/5	P55058	Phospholipid transfer protein
Q16706	Alpha-mannosidase 2	Q9UMD9	Collagen alpha-1(XVII) chain
Q9ULV4	Coronin-1C	P60900	Proteasome subunit alpha type-6
Q9H4M9	EH domain-containing protein 1	P25788	Proteasome subunit alpha type-3
Q12904	Aminoacyl tRNA synthase complex-interacting multifunctional protein 1	P63244	Receptor of activated protein C kinase 1
P28838	Cytosol aminopeptidase	P23526	Adenosylhomocysteinase
P39023	60S ribosomal protein L3	P55268	Laminin subunit beta-2
P35556	Fibrillin-2	P35908	Keratin, type II cytoskeletal 2 epidermal
Q15758	Neutral amino acid transporter B(0)	P28066	Proteasome subunit alpha type-5
P27797	Calreticulin	P07195	L-lactate dehydrogenase B chain
P11940	Polyadenylate-binding protein 1	O00560	Syntenin-1
Q15631	Translin	P13798	Acylamino-acid-releasing enzyme
O00622	CCN family member 1	P16070	CD44 antigen
P22392	Nucleoside diphosphate kinase B	P30101	Protein disulfide-isomerase A3
Q07020	60S ribosomal protein L18	P23396	40S ribosomal protein S3
Q03135	Caveolin-1	P41250	Glycine--tRNA ligase
Q9Y678	Coatomer subunit gamma-1	O43242	26S proteasome non-ATPase regulatory subunit 3
P46782	40S ribosomal protein S5	Q16658	Fascin
P06703	Protein S100-A6	P08865	40S ribosomal protein SA
O00487	26S proteasome non-ATPase regulatory subunit 14	P40227	T-complex protein 1 subunit zeta
P07737	Profilin-1	P62805	Histone H4
P31947	14-3-3 protein sigma	P23229	Integrin alpha-6
P62249	40S ribosomal protein S16	Q9Y230	RuvB-like 2
Q9UBQ5	Eukaryotic translation initiation factor 3 subunit K	P08670	Vimentin
O95373	Importin-7	O75083	WD repeat-containing protein 1
P37837	Transaldolase	Q9NYU2	UDP-glucose:glycoprotein glucosyltransferase 1
O15145	Actin-related protein 2/3 complex subunit 3	Q01518	Adenylyl cyclase-associated protein 1
Q96FQ6	Protein S100-A16	P02768	Albumin
P29692	Elongation factor 1-delta	P25786	Proteasome subunit alpha type-1
P59998	Actin-related protein 2/3 complex subunit 4	P20618	Proteasome subunit beta type-1
O00469	Procollagen-lysine,2-oxoglutarate 5-dioxygenase 2	Q02809	Procollagen-lysine,2-oxoglutarate 5-dioxygenase 1
O95084	Serine protease 23	P25787	Proteasome subunit alpha type-2
P68366	Tubulin alpha-4A chain	P08195	4F2 cell-surface antigen heavy chain
P51665	26S proteasome non-ATPase regulatory subunit 7	P36952	Serpin B5
P31949	Protein S100-A11	P05120	Plasminogen activator inhibitor 2
P04083	Annexin A1	P16144	Integrin beta-4
P62826	GTP-binding nuclear protein Ran	P62195	26S proteasome regulatory subunit 8
P47929	Galectin-7	O00231	26S proteasome non-ATPase regulatory subunit 11
P19105	Myosin regulatory light chain 12A	P35052	Glypican-1
P43686	26S proteasome regulatory subunit 6B	P06396	Gelsolin
Q92743	Serine protease HTRA1	P13010	X-ray repair cross-complementing protein 5
Q9HCY8	Protein S100-A14	Q8NBP7	Proprotein convertase subtilisin/kexin type 9
P0DP25	Calmodulin-3	P12956	X-ray repair cross-complementing protein 6
Q9BUF5	Tubulin beta-6 chain	O14818	Proteasome subunit alpha type-7
P06748	Nucleophosmin	P35998	26S proteasome regulatory subunit 7
Q7L2H7	Eukaryotic translation initiation factor 3 subunit M	Q14112	Nidogen-2
P12532	Creatine kinase U-type, mitochondrial	P26006	Integrin alpha-3
P07437	Tubulin beta chain	P07339	Cathepsin D
P15880	40S ribosomal protein S2	Q13200	26S proteasome non-ATPase regulatory subunit 2
P01130	Low-density lipoprotein receptor	Q99832	T-complex protein 1 subunit eta
P62987	Ubiquitin-60S ribosomal protein L40	Q9UHI8	A disintegrin and metalloproteinase with thrombospondin motifs 1
Q09666	Neuroblast differentiation-associated protein AHNAK	P61158	Actin-related protein 3
P05023	Sodium/potassium-transporting ATPase subunit alpha-1	P50991	T-complex protein 1 subunit delta
P46777	60S ribosomal protein L5	P05556	Integrin beta-1
P36578	60S ribosomal protein L4	P04792	Heat shock protein beta-1
Q86VP6	Cullin-associated NEDD8-dissociated protein 1	P07237	Protein disulfide-isomerase
Q7L576	Cytoplasmic FMR1-interacting protein 1	P06737	Glycogen phosphorylase, liver form
Q9UQ80	Proliferation-associated protein 2G4	P07858	Cathepsin B
Q12905	Interleukin enhancer-binding factor 2	P06744	Glucose-6-phosphate isomerase
Q14203	Dynactin subunit 1	Q9Y5X9	Endothelial lipase
Q99873	Protein arginine N-methyltransferase 1	P60842	Eukaryotic initiation factor 4A-I
P23528	Cofilin-1	P07093	Glia-derived nexin
P05388	60S acidic ribosomal protein P0	P14923	Junction plakoglobin
P52209	6-phosphogluconate dehydrogenase, decarboxylating	P02649	Apolipoprotein E
P30153	Serine/threonine-protein phosphatase 2A 65 kDa regulatory subunit A alpha isoform	P22314	Ubiquitin-like modifier-activating enzyme 1
P62333	26S proteasome regulatory subunit 10B	P00338	L-lactate dehydrogenase A chain
P19338	Nucleolin	P08238	Heat shock protein HSP 90-beta
P28072	Proteasome subunit beta type-6	Q15582	Transforming growth factor-beta-induced protein ig-h3
O00754	Lysosomal alpha-mannosidase	Q16851	UTP--glucose-1-phosphate uridylyltransferase
Q13162	Peroxiredoxin-4	Q9GZM7	Tubulointerstitial nephritis antigen-like
Q6NZI2	Caveolae-associated protein 1	Q9Y4L1	Hypoxia up-regulated protein 1
P46781	40S ribosomal protein S9	P04075	Fructose-bisphosphate aldolase A
P18206	Vinculin	P11142	Heat shock cognate 71 kDa protein
Q8IWU5	Extracellular sulfatase Sulf-2	P48643	T-complex protein 1 subunit epsilon
Q96QK1	Vacuolar protein sorting-associated protein 35	P29401	Transketolase
P10909	Clusterin	P04264	Keratin, type II cytoskeletal 1
P07686	Beta-hexosaminidase subunit beta	P06733	Alpha-enolase
P02786	Transferrin receptor protein 1	P26641	Elongation factor 1-gamma
P33176	Kinesin-1 heavy chain	P07355	Annexin A2
P14324	Farnesyl pyrophosphate synthase	P50990	T-complex protein 1 subunit theta
Q16394	Exostosin-1	Q9P2B2	Prostaglandin F2 receptor negative regulator
P61163	Alpha-centractin	P04406	Glyceraldehyde-3-phosphate dehydrogenase
P01024	Complement C3	P11216	Glycogen phosphorylase, brain form
P09758	Tumor-associated calcium signal transducer 2	P07602	Prosaposin
P15311	Ezrin	P17987	T-complex protein 1 subunit alpha
P07910	Heterogeneous nuclear ribonucleoproteins C1/C2	Q8WUM4	Programmed cell death 6-interacting protein
Q9NQC3	Reticulon-4	Q5VTE0	Putative elongation factor 1-alpha-like 3
P28070	Proteasome subunit beta type-4	P13645	Keratin, type I cytoskeletal 10
P09211	Glutathione S-transferase P	P49368	T-complex protein 1 subunit gamma
Q99436	Proteasome subunit beta type-7	P53634	Dipeptidyl peptidase 1
O60506	Heterogeneous nuclear ribonucleoprotein Q	P78371	T-complex protein 1 subunit beta
P18124	60S ribosomal protein L7	P14625	Endoplasmin
P27708	CAD protein	P35527	Keratin, type I cytoskeletal 9
Q08431	Lactadherin	Q02388	Collagen alpha-1(VII) chain
P49720	Proteasome subunit beta type-3	O94985	Calsyntenin-1
O00391	Sulfhydryl oxidase 1	A8K2U0	Alpha-2-macroglobulin-like protein 1
Q9Y265	RuvB-like 1	P58107	Epiplakin
P32926	Desmoglein-3	P11021	Endoplasmic reticulum chaperone BiP
Q99460	26S proteasome non-ATPase regulatory subunit 1	Q9NT68	Teneurin-2
Q9BXJ1	Complement C1q tumor necrosis factor-related protein 1	P14618	Pyruvate kinase PKM
Q16555	Dihydropyrimidinase-related protein 2	O43707	Alpha-actinin-4
P60660	Myosin light polypeptide 6	Q08380	Galectin-3-binding protein
P28074	Proteasome subunit beta type-5	P12814	Alpha-actinin-1
P25789	Proteasome subunit alpha type-4	P13639	Elongation factor 2
P62241	40S ribosomal protein S8	O15230	Laminin subunit alpha-5
O15144	Actin-related protein 2/3 complex subunit 2	Q92626	Peroxidasin homolog
P63104	14-3-3 protein zeta/delta	O00468	Agrin
O60568	Multifunctional procollagen lysine hydroxylase and glycosyltransferase LH3	P07942	Laminin subunit beta-1
P14868	Aspartate--tRNA ligase, cytoplasmic	P35442	Thrombospondin-2
P13497	Bone morphogenetic protein 1	P11047	Laminin subunit gamma-1
Q15008	26S proteasome non-ATPase regulatory subunit 6	Q13753	Laminin subunit gamma-2
O00232	26S proteasome non-ATPase regulatory subunit 12	Q14764	Major vault protein
Q14697	Neutral alpha-glucosidase AB	Q00610	Clathrin heavy chain 1
P26639	Threonine--tRNA ligase 1, cytoplasmic	P55072	Transitional endoplasmic reticulum ATPase
P62191	26S proteasome regulatory subunit 4	Q13751	Laminin subunit beta-3
Q9UNM6	26S proteasome non-ATPase regulatory subunit 13	P53396	ATP-citrate synthase
P35221	Catenin alpha-1	Q14204	Cytoplasmic dynein 1 heavy chain 1
P26038	Moesin	Q9NYQ8	Protocadherin Fat 2
Q6PCB0	von Willebrand factor A domain-containing protein 1	P35579	Myosin-9
Q15063	Periostin	Q14517	Protocadherin Fat 1
P60228	Eukaryotic translation initiation factor 3 subunit E	Q16787	Laminin subunit alpha-3
P02794	Ferritin heavy chain	P21333	Filamin-A
P49721	Proteasome subunit beta type-2	P49327	Fatty acid synthase
P23352	Anosmin-1	Q99715	Collagen alpha-1(XII) chain
P03956	Interstitial collagenase	O75369	Filamin-B
P53618	Coatomer subunit beta	P07996	Thrombospondin-1
Q92598	Heat shock protein 105 kDa	P98160	Basement membrane-specific heparan sulfate proteoglycan core protein
P28799	Progranulin	P02751	Fibronectin-1
P00558	Phosphoglycerate kinase 1	Q15149	Plectin
P61160	Actin-related protein 2	P24821	Tenascin-C
Q99613	Eukaryotic translation initiation factor 3 subunit C
P05067	Amyloid-beta precursor protein
P55058	Phospholipid transfer protein
Q9UMD9	Collagen alpha-1(XVII) chain
P60900	Proteasome subunit alpha type-6
P25788	Proteasome subunit alpha type-3
P63244	Receptor of activated protein C kinase 1
P23526	Adenosylhomocysteinase
P55268	Laminin subunit beta-2
P35908	Keratin, type II cytoskeletal 2 epidermal
P28066	Proteasome subunit alpha type-5
P07195	L-lactate dehydrogenase B chain
O00560	Syntenin-1
P26640	Valine--tRNA ligase
P13798	Acylamino-acid-releasing enzyme
Q9Y262	Eukaryotic translation initiation factor 3 subunit L
Q14974	Importin subunit beta-1
P16070	CD44 antigen
P30101	Protein disulfide-isomerase A3
P23396	40S ribosomal protein S3
P41250	Glycine--tRNA ligase
O43242	26S proteasome non-ATPase regulatory subunit 3
Q16658	Fascin
P08865	40S ribosomal protein SA
P40227	T-complex protein 1 subunit zeta
P62805	Histone H4
P23229	Integrin alpha-6
Q9Y230	RuvB-like 2
P53621	Coatomer subunit alpha
P08670	Vimentin
Q7KZF4	Staphylococcal nuclease domain-containing protein 1
O75083	WD repeat-containing protein 1
Q9NYU2	UDP-glucose:glycoprotein glucosyltransferase 1
Q01518	Adenylyl cyclase-associated protein 1
P02768	Albumin
P25786	Proteasome subunit alpha type-1
P20618	Proteasome subunit beta type-1
Q02809	Procollagen-lysine,2-oxoglutarate 5-dioxygenase 1
P25787	Proteasome subunit alpha type-2
P08195	4F2 cell-surface antigen heavy chain
P36952	Serpin B5
P05120	Plasminogen activator inhibitor 2
P41252	Isoleucine--tRNA ligase, cytoplasmic
P55884	Eukaryotic translation initiation factor 3 subunit B
P07814	Bifunctional glutamate/proline--tRNA ligase
P16144	Integrin beta-4
P62195	26S proteasome regulatory subunit 8
O00231	26S proteasome non-ATPase regulatory subunit 11
P17980	26S proteasome regulatory subunit 6A
P35052	Glypican-1
P06396	Gelsolin
P13010	X-ray repair cross-complementing protein 5
Q8NBP7	Proprotein convertase subtilisin/kexin type 9
P12956	X-ray repair cross-complementing protein 6
O14818	Proteasome subunit alpha type-7
P35998	26S proteasome regulatory subunit 7
Q14112	Nidogen-2
P26006	Integrin alpha-3
P07339	Cathepsin D
Q13200	26S proteasome non-ATPase regulatory subunit 2
Q99832	T-complex protein 1 subunit eta
Q9UHI8	A disintegrin and metalloproteinase with thrombospondin motifs 1
P61158	Actin-related protein 3
P50991	T-complex protein 1 subunit delta
P05556	Integrin beta-1
P04792	Heat shock protein beta-1
Q08211	ATP-dependent RNA helicase A
P07237	Protein disulfide-isomerase
P06737	Glycogen phosphorylase, liver form
P07858	Cathepsin B
P06744	Glucose-6-phosphate isomerase
Q9Y5X9	Endothelial lipase
P60842	Eukaryotic initiation factor 4A-I
P07093	Glia-derived nexin
P14923	Junction plakoglobin
P02649	Apolipoprotein E
P07900	Heat shock protein HSP 90-alpha
P22314	Ubiquitin-like modifier-activating enzyme 1
P00338	L-lactate dehydrogenase A chain
P08238	Heat shock protein HSP 90-beta
Q01082	Spectrin beta chain, non-erythrocytic 1
Q15582	Transforming growth factor-beta-induced protein ig-h3
Q6YHK3	CD109 antigen
Q16851	UTP--glucose-1-phosphate uridylyltransferase
Q9GZM7	Tubulointerstitial nephritis antigen-like
Q9Y4L1	Hypoxia up-regulated protein 1
P04075	Fructose-bisphosphate aldolase A
P11142	Heat shock cognate 71 kDa protein
P48643	T-complex protein 1 subunit epsilon
P29401	Transketolase
P04264	Keratin, type II cytoskeletal 1
P06733	Alpha-enolase
P26641	Elongation factor 1-gamma
P07355	Annexin A2
P50990	T-complex protein 1 subunit theta
Q9P2B2	Prostaglandin F2 receptor negative regulator
P04406	Glyceraldehyde-3-phosphate dehydrogenase
Q14152	Eukaryotic translation initiation factor 3 subunit A
Q13813	Spectrin alpha chain, non-erythrocytic 1
P11216	Glycogen phosphorylase, brain form
P07602	Prosaposin
P17987	T-complex protein 1 subunit alpha
Q8WUM4	Programmed cell death 6-interacting protein
Q5VTE0	Putative elongation factor 1-alpha-like 3
P13645	Keratin, type I cytoskeletal 10
P49368	T-complex protein 1 subunit gamma
P53634	Dipeptidyl peptidase 1
P78371	T-complex protein 1 subunit beta
P14625	Endoplasmin
P35527	Keratin, type I cytoskeletal 9
Q02388	Collagen alpha-1(VII) chain
O94985	Calsyntenin-1
A8K2U0	Alpha-2-macroglobulin-like protein 1
P58107	Epiplakin
P11021	Endoplasmic reticulum chaperone BiP
Q9NT68	Teneurin-2
P14618	Pyruvate kinase PKM
O43707	Alpha-actinin-4
Q08380	Galectin-3-binding protein
P15924	Desmoplakin
P12814	Alpha-actinin-1
P13639	Elongation factor 2
O15230	Laminin subunit alpha-5
Q92626	Peroxidasin homolog
O00468	Agrin
P07942	Laminin subunit beta-1
P35442	Thrombospondin-2
P11047	Laminin subunit gamma-1
P46940	Ras GTPase-activating-like protein IQGAP1
Q13753	Laminin subunit gamma-2
Q14764	Major vault protein
Q00610	Clathrin heavy chain 1
P55072	Transitional endoplasmic reticulum ATPase
Q13751	Laminin subunit beta-3
P53396	ATP-citrate synthase
Q14204	Cytoplasmic dynein 1 heavy chain 1
Q9NYQ8	Protocadherin Fat 2
P35579	Myosin-9
Q14517	Protocadherin Fat 1
Q16787	Laminin subunit alpha-3
P21333	Filamin-A
P49327	Fatty acid synthase
Q99715	Collagen alpha-1(XII) chain
O75369	Filamin-B
P07996	Thrombospondin-1
P98160	Basement membrane-specific heparan sulfate proteoglycan core protein
P02751	Fibronectin-1
Q15149	Plectin
P24821	Tenascin-C
